# Supplementary material for: EXPLUME v1.0: a model for personal exposure to ambient O 3 and PM 2.5
Source: Copernicus journal article supplement (doi:10.5194/gmd-13-1075-2020), 2020-03-10
Supplement: Supplementary file 1 [file gmd-13-1075-2020-supplement.pdf]

Supplement of Geosci. Model Dev., 13, 1075–1094, 2020  
<https://doi.org/10.5194/gmd-13-1075-2020-supplement>  
© Author(s) 2020. This work is distributed under  
the Creative Commons Attribution 4.0 License.

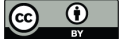

*Supplement of*

## **EXPLUME v1.0: a model for personal exposure to ambient O<sub>3</sub> and PM<sub>2.5</sub>**

**Myrto Valari et al.**

*Correspondence to:* Myrto Valari (myrto.valari@lmd.polytechnique.fr)

The copyright of individual parts of the supplement might differ from the CC BY 4.0 License.

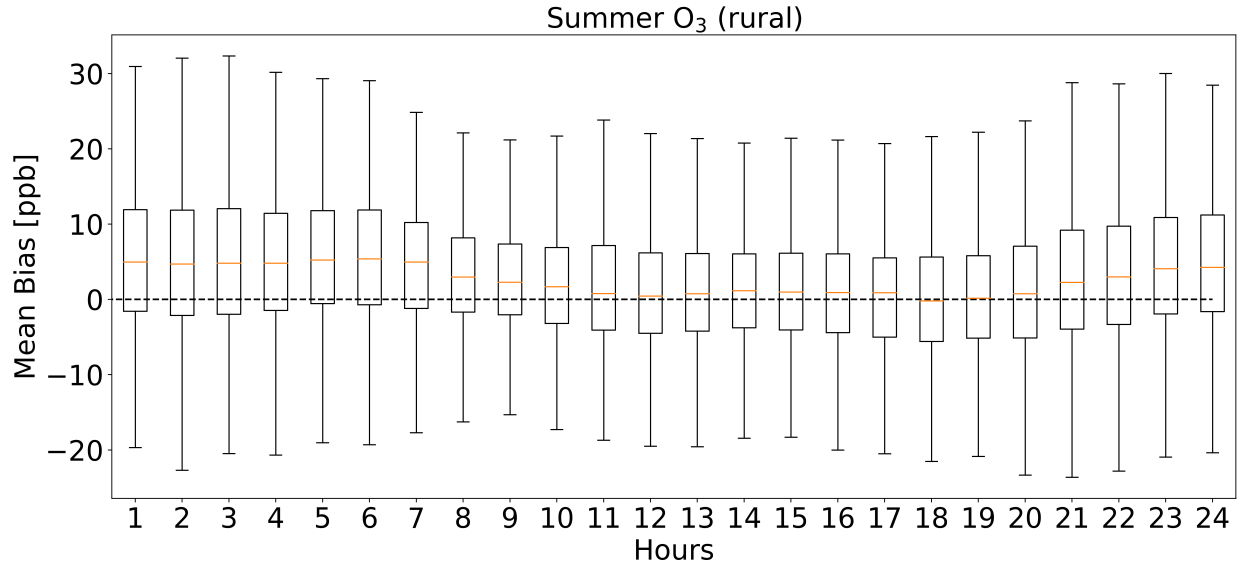

**Figure S1** : Hourly mean bias of simulated surface O<sub>3</sub> concentrations calculated over the summer 2017 over 7 rural monitor sites.

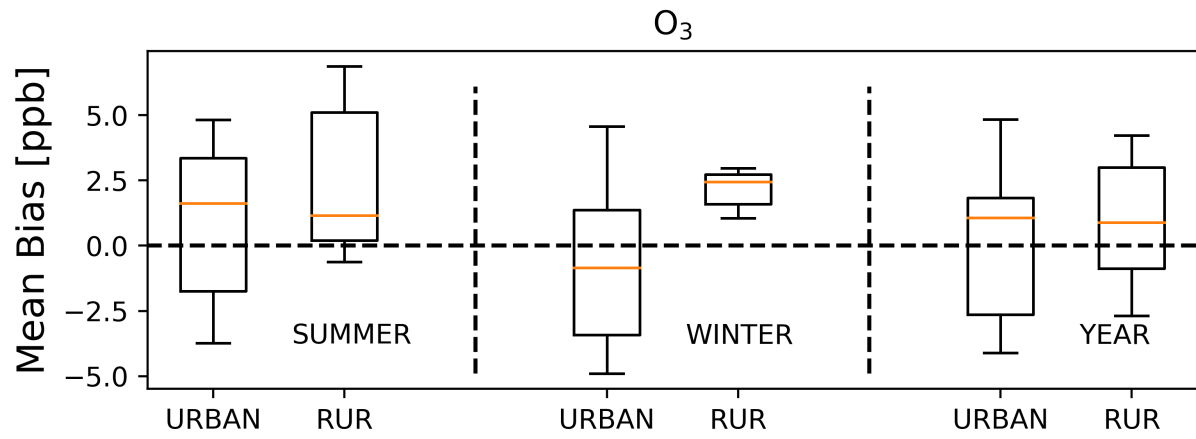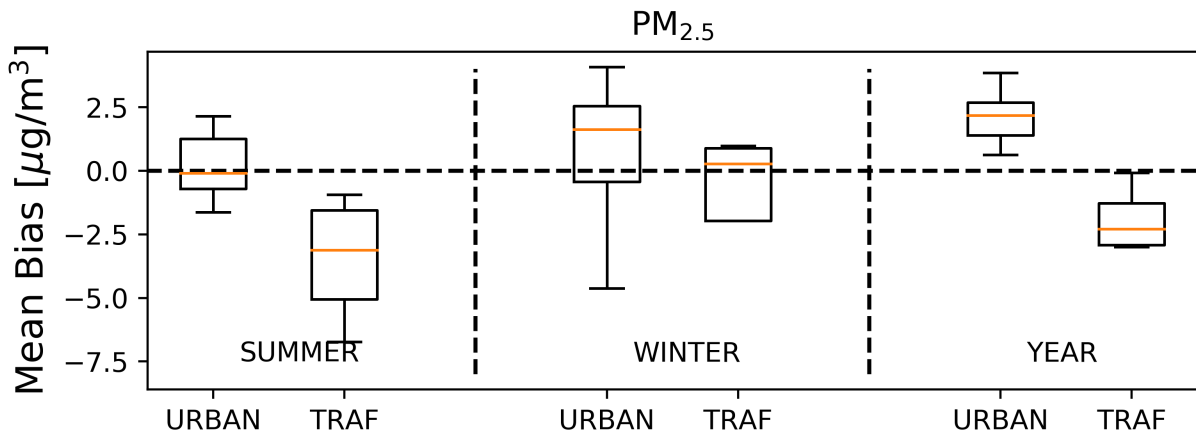

**Figure S2** : Box plots of the distributions of scores of the CHIMERE 2017 simulation at the different monitoring sites grouped into urban background (15) and rural (7) categories for ozone (top) and urban background (6) and traffic (4) sites for  $PM_{2.5}$  (bottom).
